# Supplementary material for: Global, regional, national burden and gender disparity of cataract: findings from the global burden of disease study 2019
Source: Springer Nature journal article supplement (doi:10.1186/s12889-022-14491-0), 2022-11-12
Supplement: MOESM1 [file 23705554]

**A**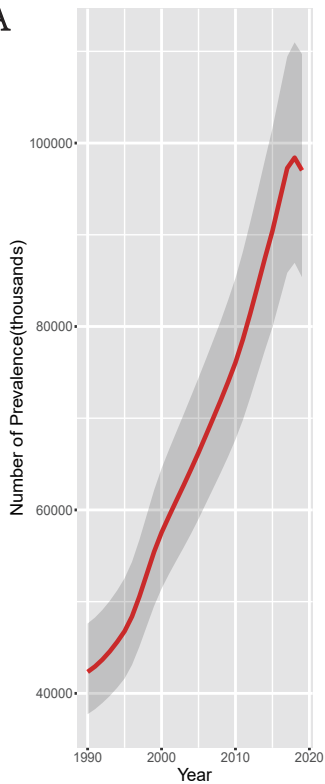**B**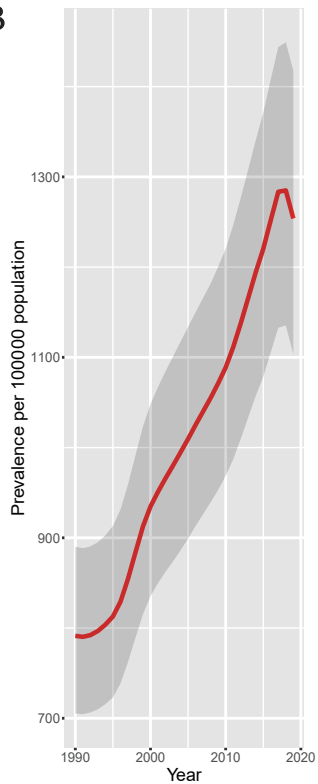**C**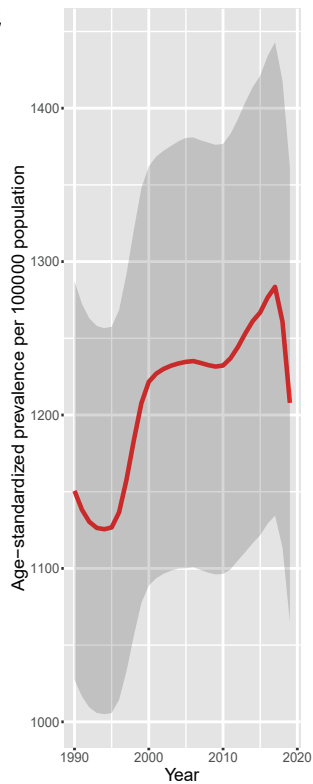

FigureS1

Trends in global burden of cataracts in terms of prevalence numbers (A), crude prevalence rates (B), and age-standardized prevalence rates (C), from 1990 to 2019. Shaded areas represent 95% uncertainty intervals. DALYs = disability-adjusted life years

**A****Global DALYs rate of Cataract**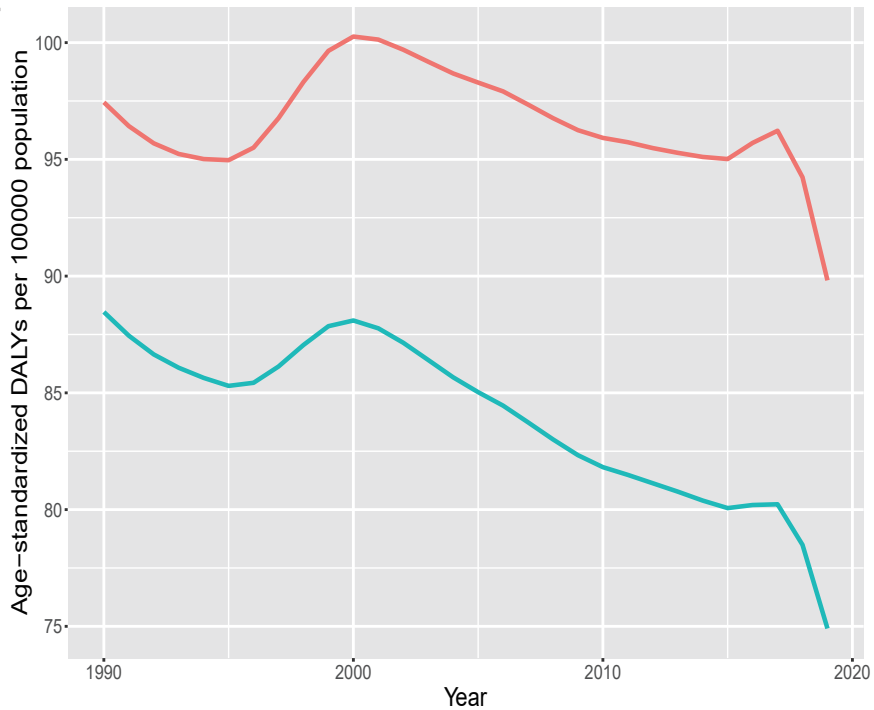**B****Global prevalence rate of Cataract**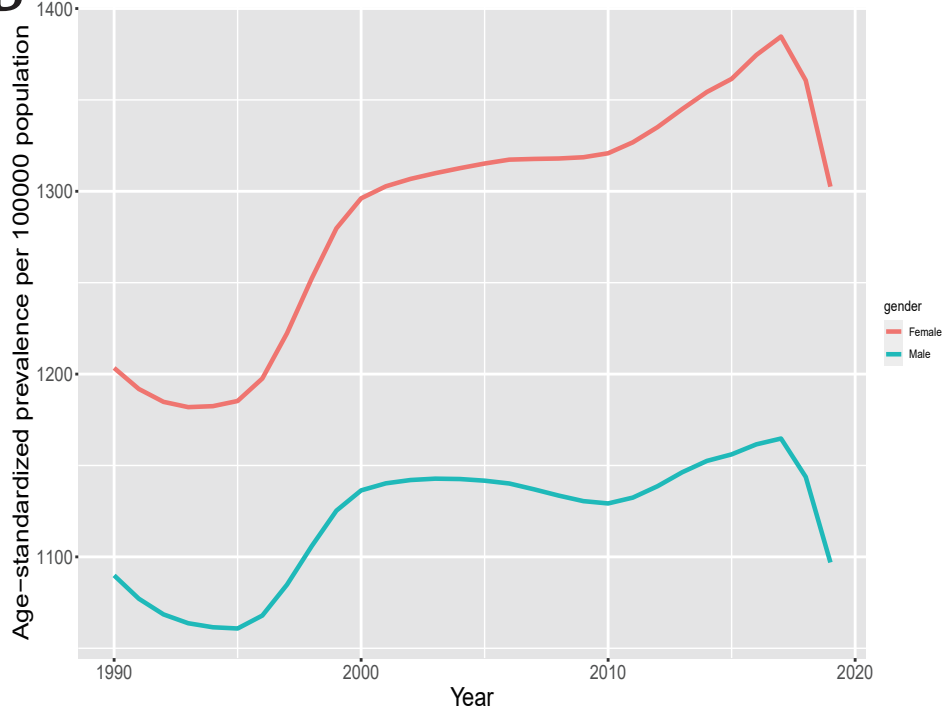

FigureS2

The persistence of gender inequality in global burden of cataracts from 1990 to 2019, in terms of age-standardized DALY rates (A), and age-standardized prevalence rates (B). DALYs=disability-adjusted life years.

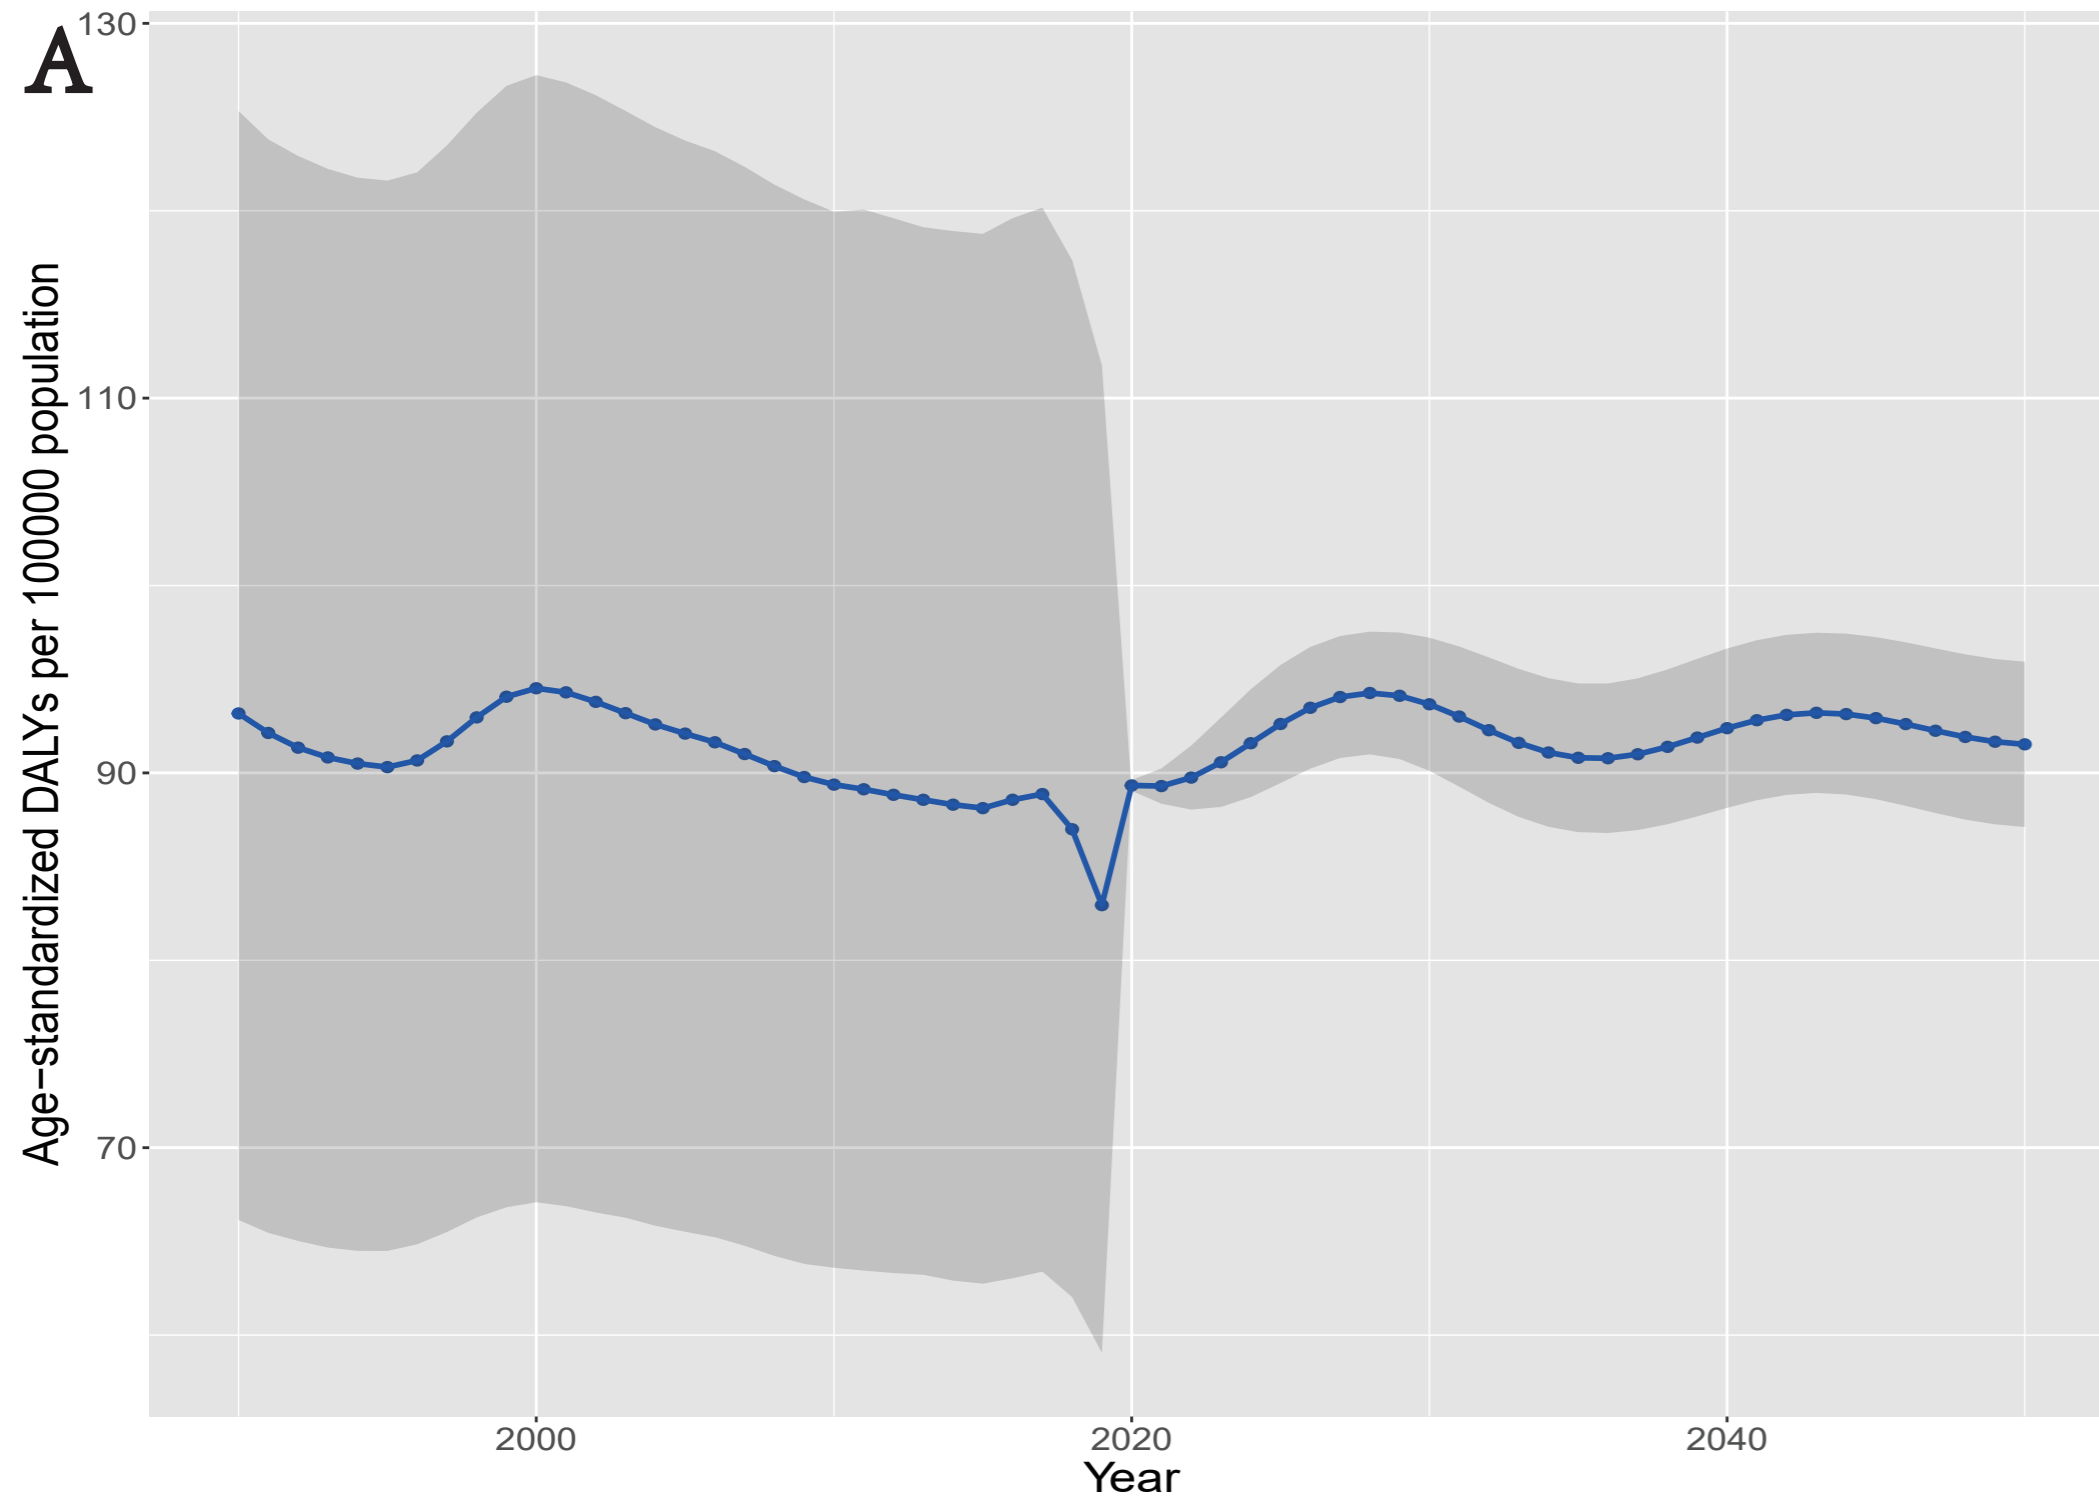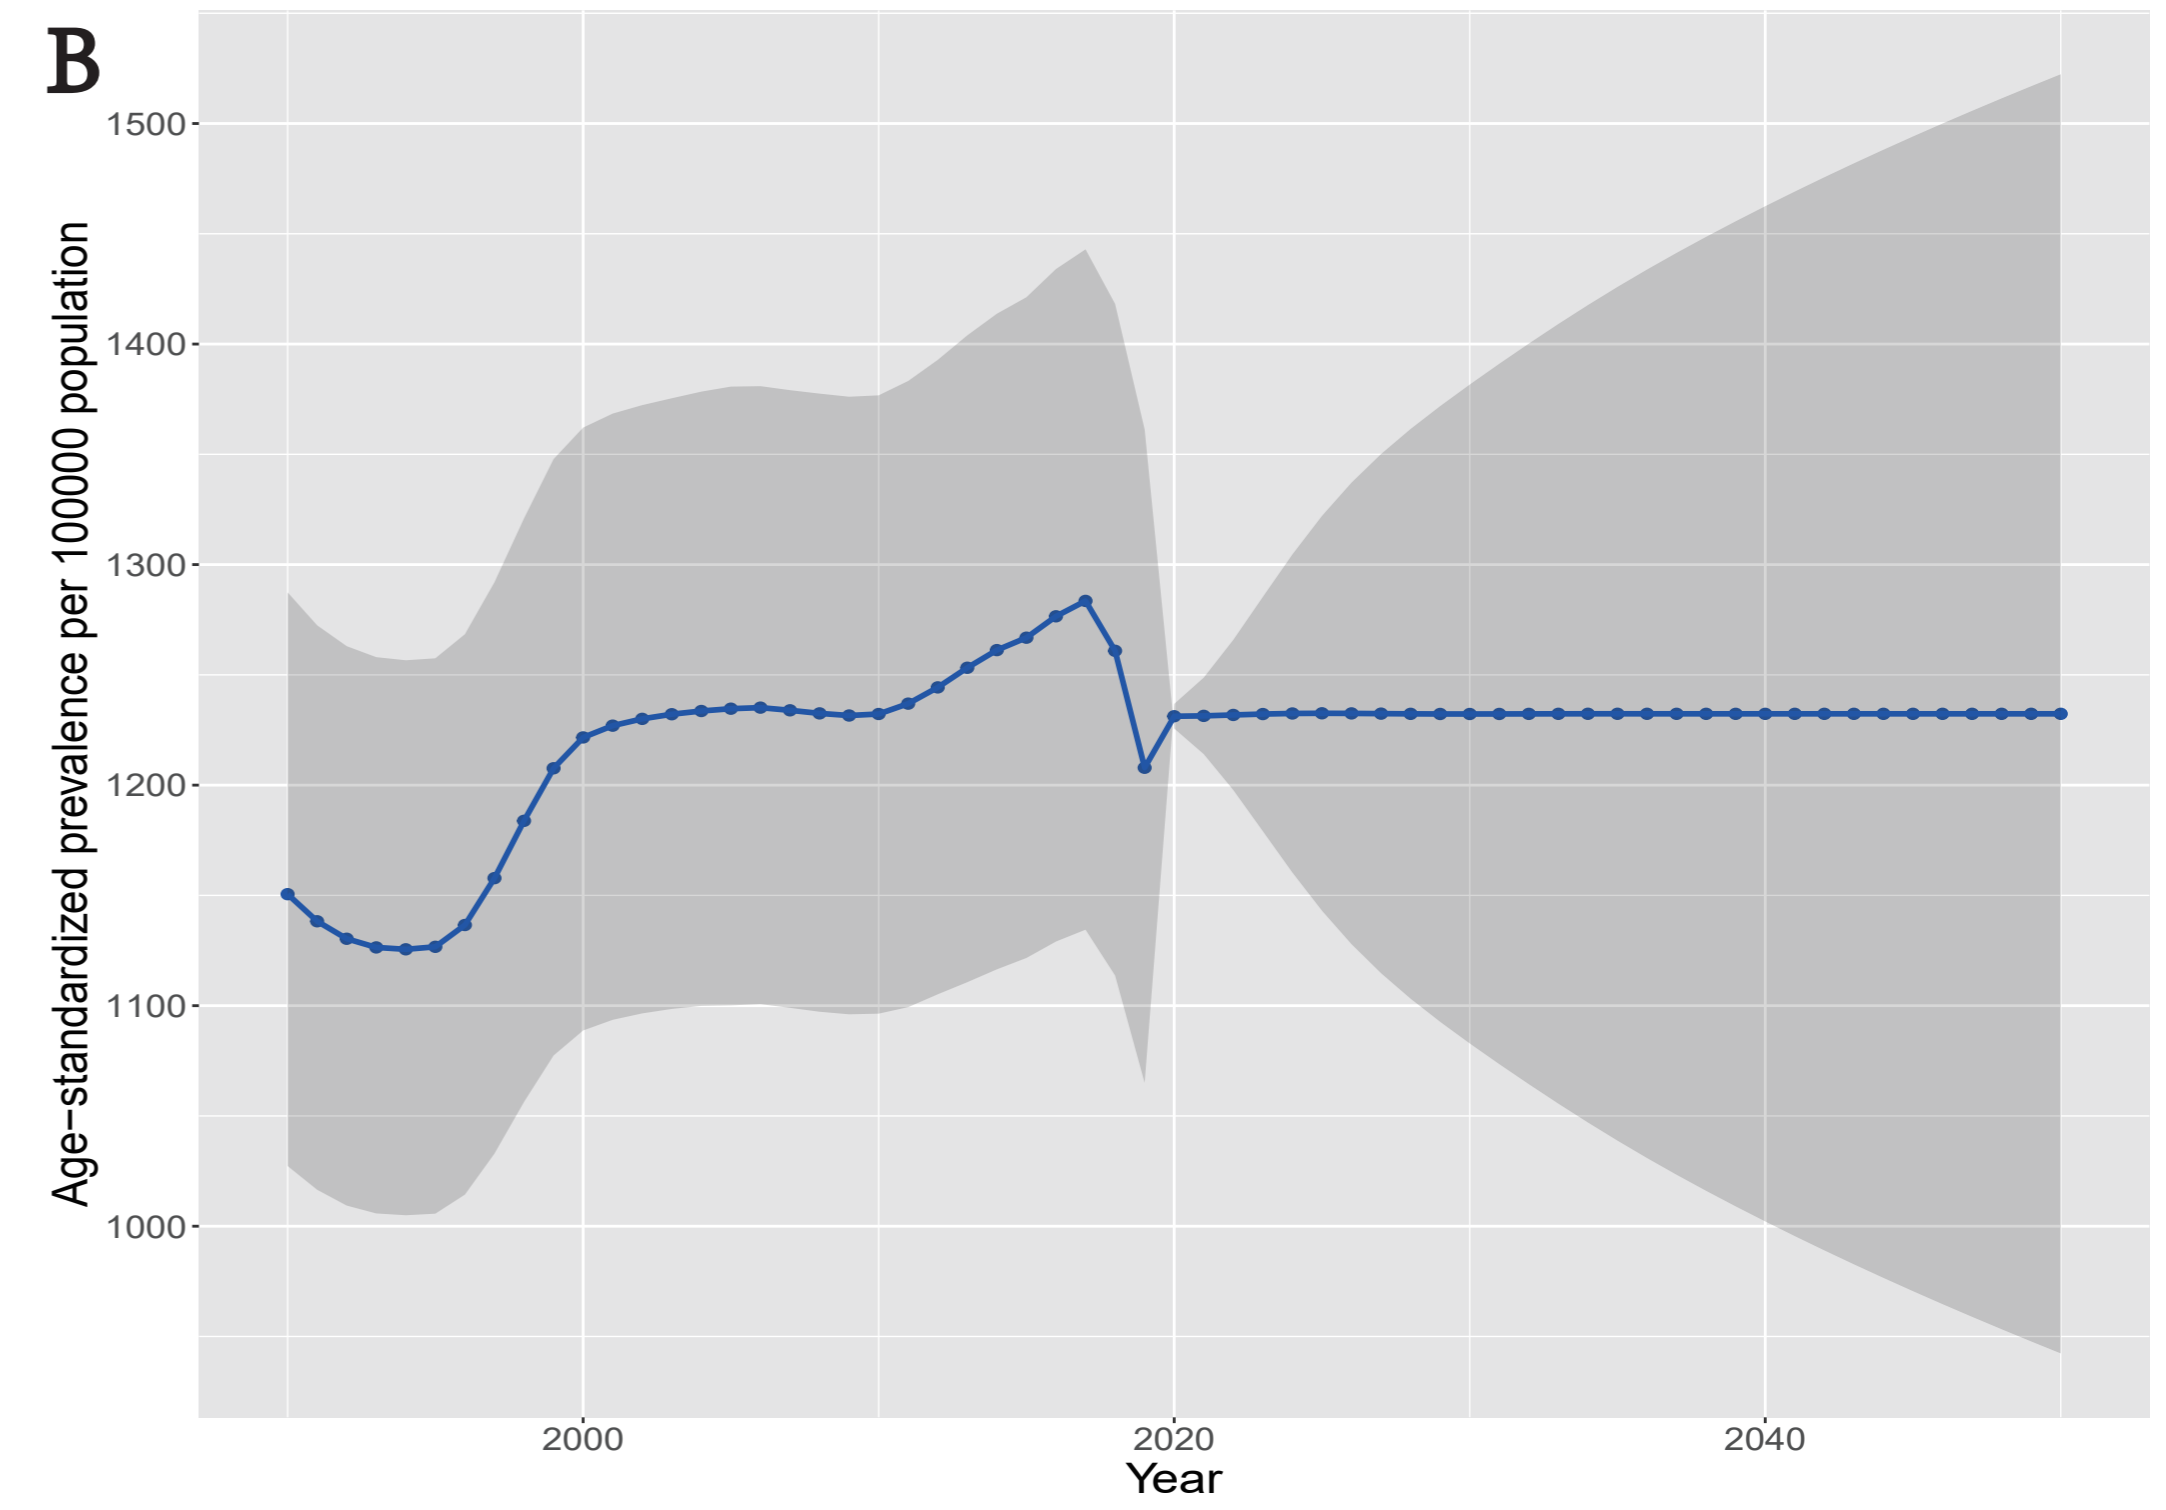

FigureS3

Global burden of cataracts from 1990 to 2050 in terms of age-standardized DALY rates (A), and age-standardized prevalence rates (B). Shaded areas represent 95% uncertainty intervals. DALYs = disability-adjusted life years.
